# Supplementary material for: Phytoplankton productivity and rapid trophic transfer tomicrozooplankton stimulated by turbulent nitrate flux inoligotrophic Kuroshio Current
Source: Copernicus journal article supplement (doi:10.5194/bg-2019-377), 2019-10-07
Supplement: Supplementary file 1 [file bg-2019-377-supplement.pdf]

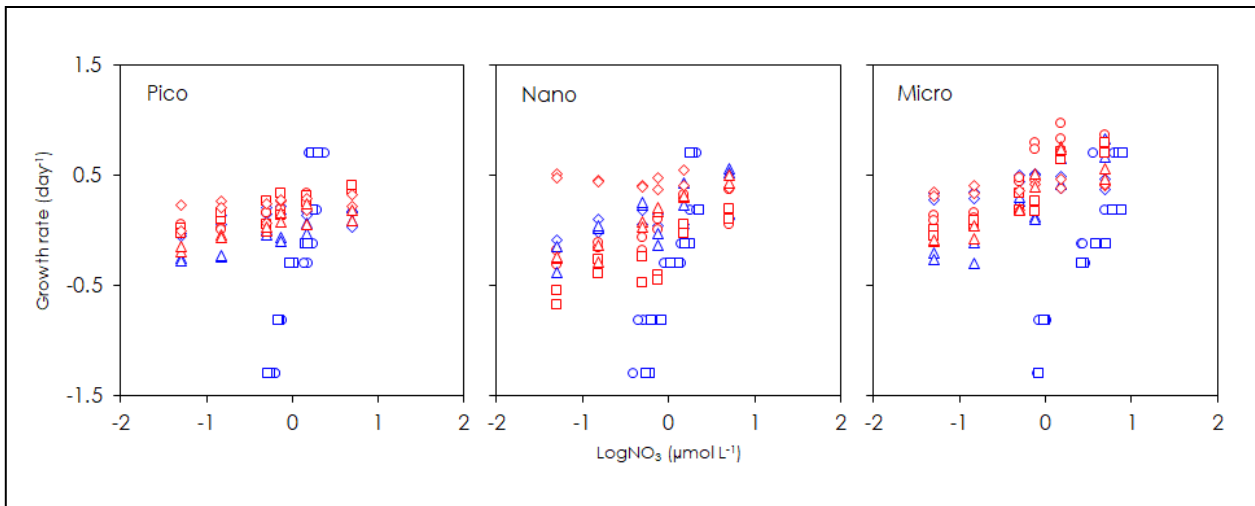

418

419 **Supplement Figure 1** Relationship of phytoplankton growth rates to logarithmically transformed concentrations of  
 420 enriched nitrate. Blue and red circles mean the stations in the upstream and downstream Kuroshio in the Tokara Strait,  
 421 respectively. Pico: chlorophyll smaller than 2 μm. Nano: chlorophyll between 2 and 11 μm. Micro: chlorophyll larger  
 422 than 11 μm.

423
